# Supplementary material
Source: PubMed Central journal article supplement (PMC4261990)
Supplement: bm501352s_si_001.pdf [file bm501352s_si_001.pdf]

**Supporting Information for**

**Multifunctional PEG Retinylamine Conjugate Provides Prolonged Protection against  
Retinal Degeneration in Mice**

Guanping Yu<sup>1,4</sup>, Xueming Wu<sup>1,4</sup>, Nadia Ayat<sup>1</sup>, Akiko Maeda<sup>2,3</sup>, Song-Qi Gao<sup>2</sup>, Marcin Golczak<sup>2</sup>,  
Krzysztof Palczewski<sup>2</sup>, Zheng-Rong Lu<sup>1</sup>

<sup>1</sup>Department of Biomedical Engineering, School of Engineering, Case Western Reserve University,  
Cleveland, Ohio 44140, USA

<sup>2</sup>Department of Pharmacology, Cleveland Center for Membrane and Structural Biology, School of  
Medicine, Case Western Reserve University, Cleveland, Ohio 44140, USA.

<sup>3</sup>Department of Ophthalmology, School of Medicine, Case Western Reserve University, Cleveland,  
Ohio 44140, USA.

<sup>4</sup>These authors contributed equally to this work.

Correspondence to: Dr. Zheng-Rong Lu      Email: zxl125@case.edu

## Table of Contents

|                                                                                                                                                             |    |
|-------------------------------------------------------------------------------------------------------------------------------------------------------------|----|
| Fig. 1. <sup>1</sup> H NMR spectrum of retinylamine (Ret-NH <sub>2</sub> ) -----                                                                            | 3  |
| Fig. 2. <sup>1</sup> H NMR spectrum of peptide NH <sub>2</sub> -GFL-OH·TFA -----                                                                            | 4  |
| Fig. 3. <sup>1</sup> H NMR spectrum of starting material PEG-8PA -----                                                                                      | 5  |
| Fig. 4. <sup>1</sup> H NMR spectrum of intermediate PEG-8(PA-GFL-OH) -----                                                                                  | 6  |
| Fig. 5. <sup>1</sup> H NMR spectrum of PEG-GFL-NH-Ret conjugate -----                                                                                       | 7  |
| Fig. 6. <sup>1</sup> H NMR spectrum of <i>p</i> -nitroaniline (pNA) -----                                                                                   | 8  |
| Fig. 7. <sup>1</sup> H NMR spectrum of Leu-pNA-----                                                                                                         | 9  |
| Fig. 8. <sup>1</sup> H NMR spectrum of peptide NH <sub>2</sub> -GF-OH·TFA -----                                                                             | 10 |
| Fig. 9. <sup>1</sup> H NMR spectrum of intermediate PEG-8(PA-GF-OH) -----                                                                                   | 11 |
| Fig. 10. <sup>1</sup> H NMR spectrum of PEG-GFL-pNA conjugate -----                                                                                         | 12 |
| Fig. 11. MALDI-TOF spectrum of peptide linker NH <sub>2</sub> -GFL-OH-----                                                                                  | 13 |
| Fig. 12. OCT images indicate representative morphology of <i>Abca4</i> <sup>-/-</sup> <i>Rdh8</i> <sup>-/-</sup> mouse retinas for 6 day pretreatment ----- | 13 |

PROTON  
 Retinylamine-080812  
 gxy40\_08Aug2012

| Parameter                 | Value               |
|---------------------------|---------------------|
| 1 Title                   | PROTON              |
| 2 Origin                  | Varian              |
| 3 Spectrometer            | inova               |
| 4 Solvent                 | CDCl3               |
| 5 Temperature             | 25.0                |
| 6 Pulse Sequence          | s2pul               |
| 7 Experiment              | 1D                  |
| 8 Number of Scans         | 8                   |
| 9 Receiver Gain           | 44                  |
| 10 Relaxation Delay       | 1.0000              |
| 11 Pulse Width            | 0.0000              |
| 12 Acquisition Time       | 3.7440              |
| 13 Acquisition Date       | 2012-08-08T13:44:03 |
| 14 Modification Date      | 2012-08-08T12:44:00 |
| 15 Spectrometer Frequency | 399.75              |
| 16 Spectral Width         | 6395.9              |
| 17 Lowest Frequency       | -789.5              |
| 18 Nucleus                | 1H                  |
| 19 Acquired Size          | 23946               |
| 20 Spectral Size          | 65536               |

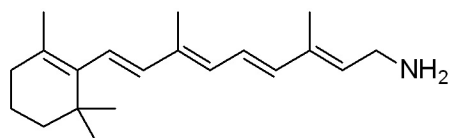

**Retinylamine**  
 Chemical Formula: C<sub>20</sub>H<sub>31</sub>N

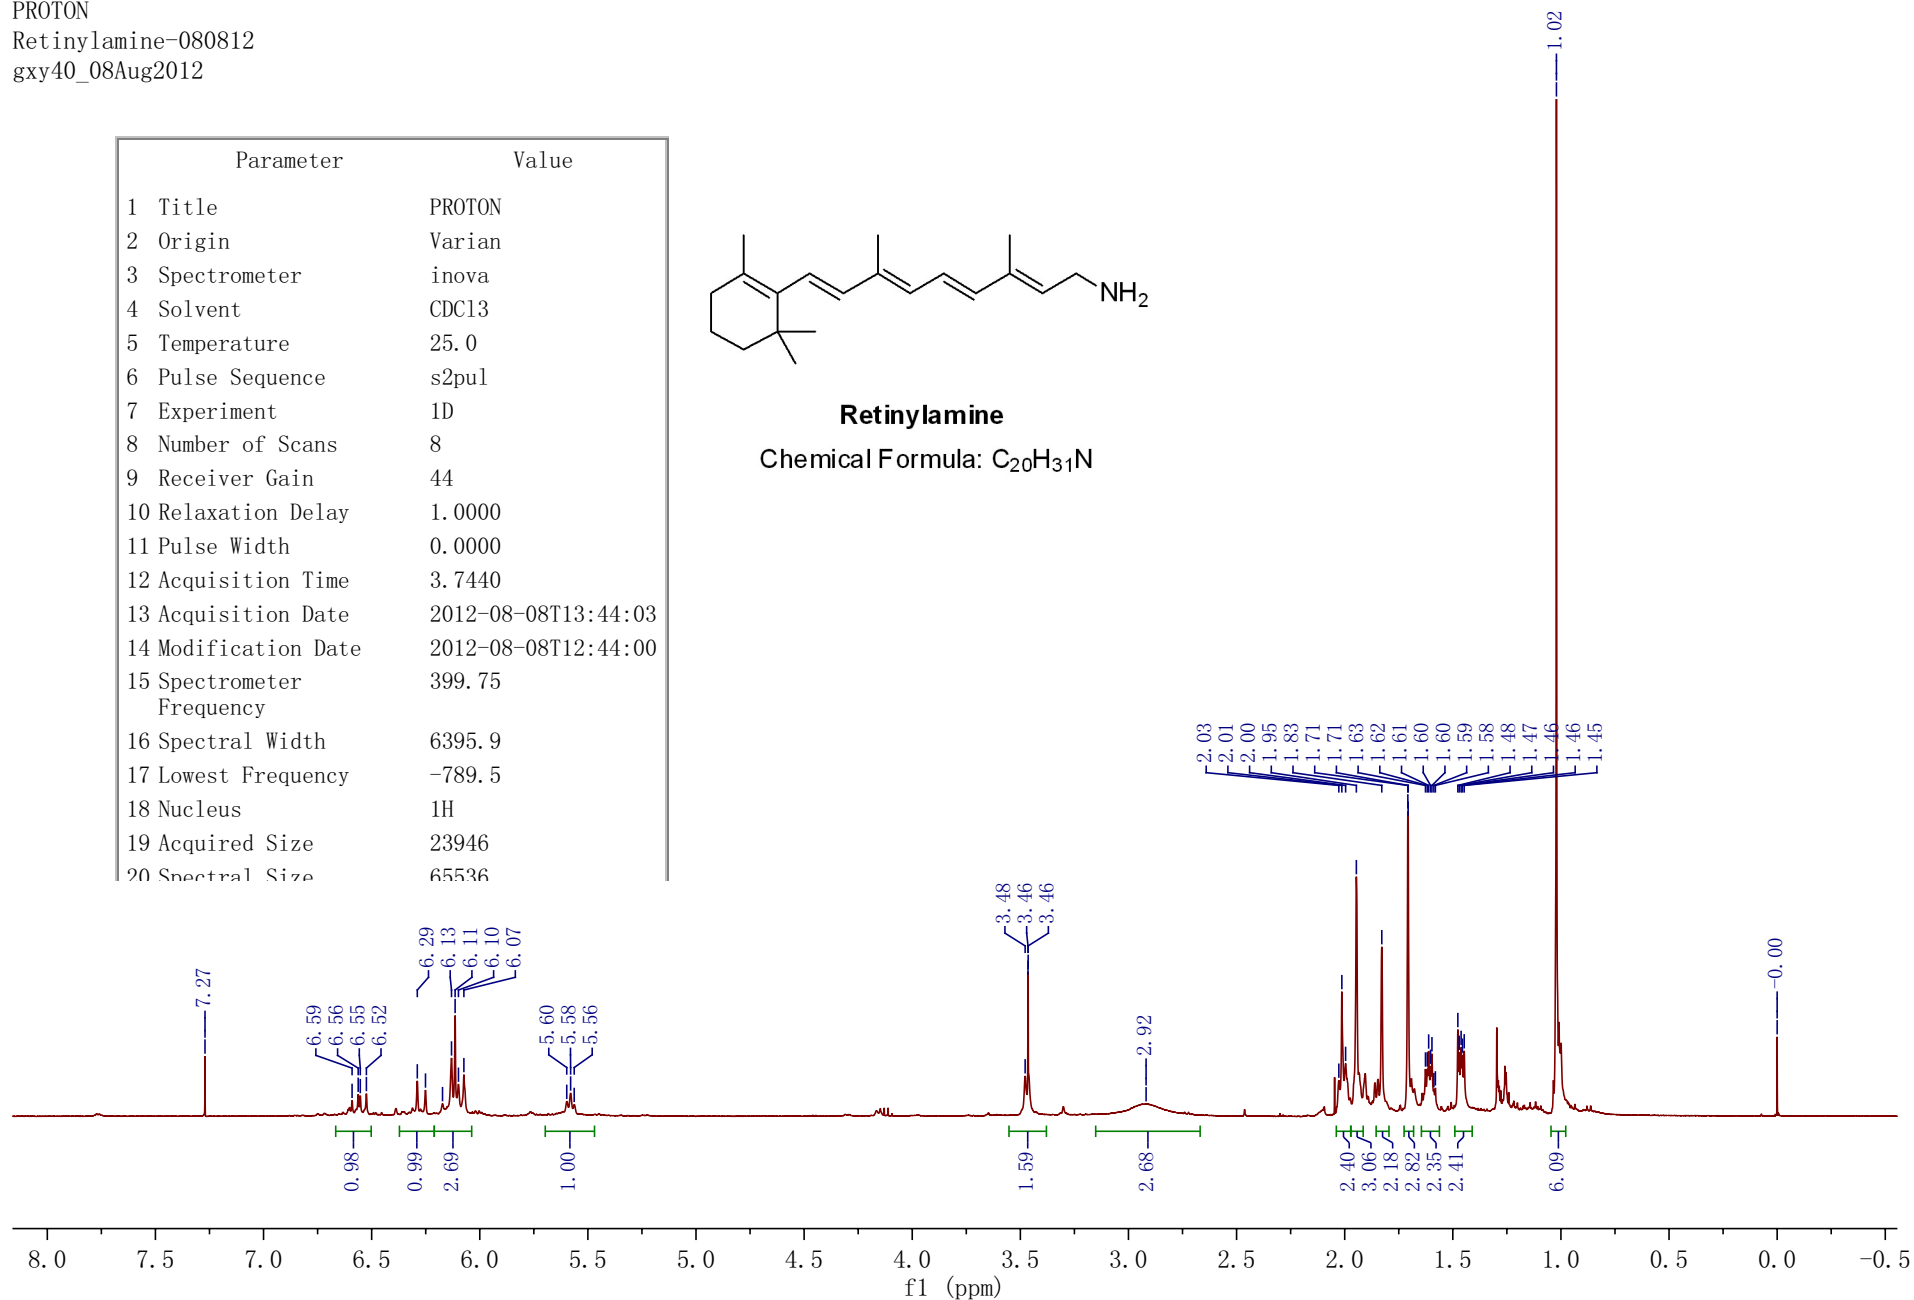

Fig. 1. <sup>1</sup>H NMR spectrum of retinylamine (Ret-NH<sub>2</sub>)

PROTON  
 NH<sub>2</sub>-GFL-OH  
 gxy40\_20Apr2012-10:55:59  
 Data saved in:  
 chem400:/export/home/gxy40/vnmrsys/data

| Parameter            | Value               |
|----------------------|---------------------|
| 1 Title              | PROTON              |
| 2 Origin             | Varian              |
| 3 Spectrometer       | inova               |
| 4 Solvent            | D2O                 |
| 5 Temperature        | 25.0                |
| 6 Pulse Sequence     | s2pul               |
| 7 Experiment         | 1D                  |
| 8 Number of Scans    | 8                   |
| 9 Receiver Gain      | 48                  |
| 10 Relaxation Delay  | 1.0000              |
| 11 Pulse Width       | 0.0000              |
| 12 Acquisition Time  | 3.7440              |
| 13 Acquisition Date  | 2012-04-20T11:58:52 |
| 14 Modification Date | 2012-04-20T10:58:00 |
| 15 Spectrometer      | 399.75              |
| Frequency            |                     |
| 16 Spectral Width    | 6395.9              |
| 17 Lowest Frequency  | -736.3              |
| 18 Nucleus           | 1H                  |
| 19 Acquired Size     | 23946               |
| 20 Spectral Size     | 65536               |

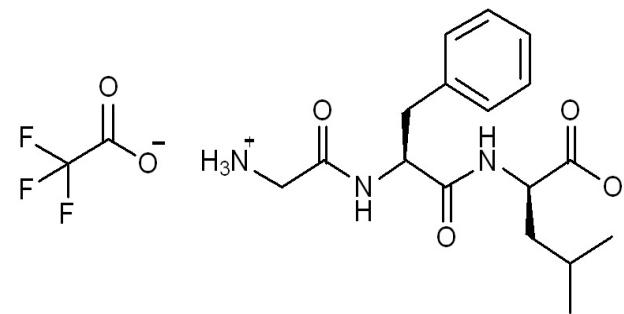

**NH<sub>2</sub>-GFL-OH·TFA**

Chemical Formula: C<sub>19</sub>H<sub>26</sub>F<sub>3</sub>N<sub>3</sub>O<sub>6</sub>

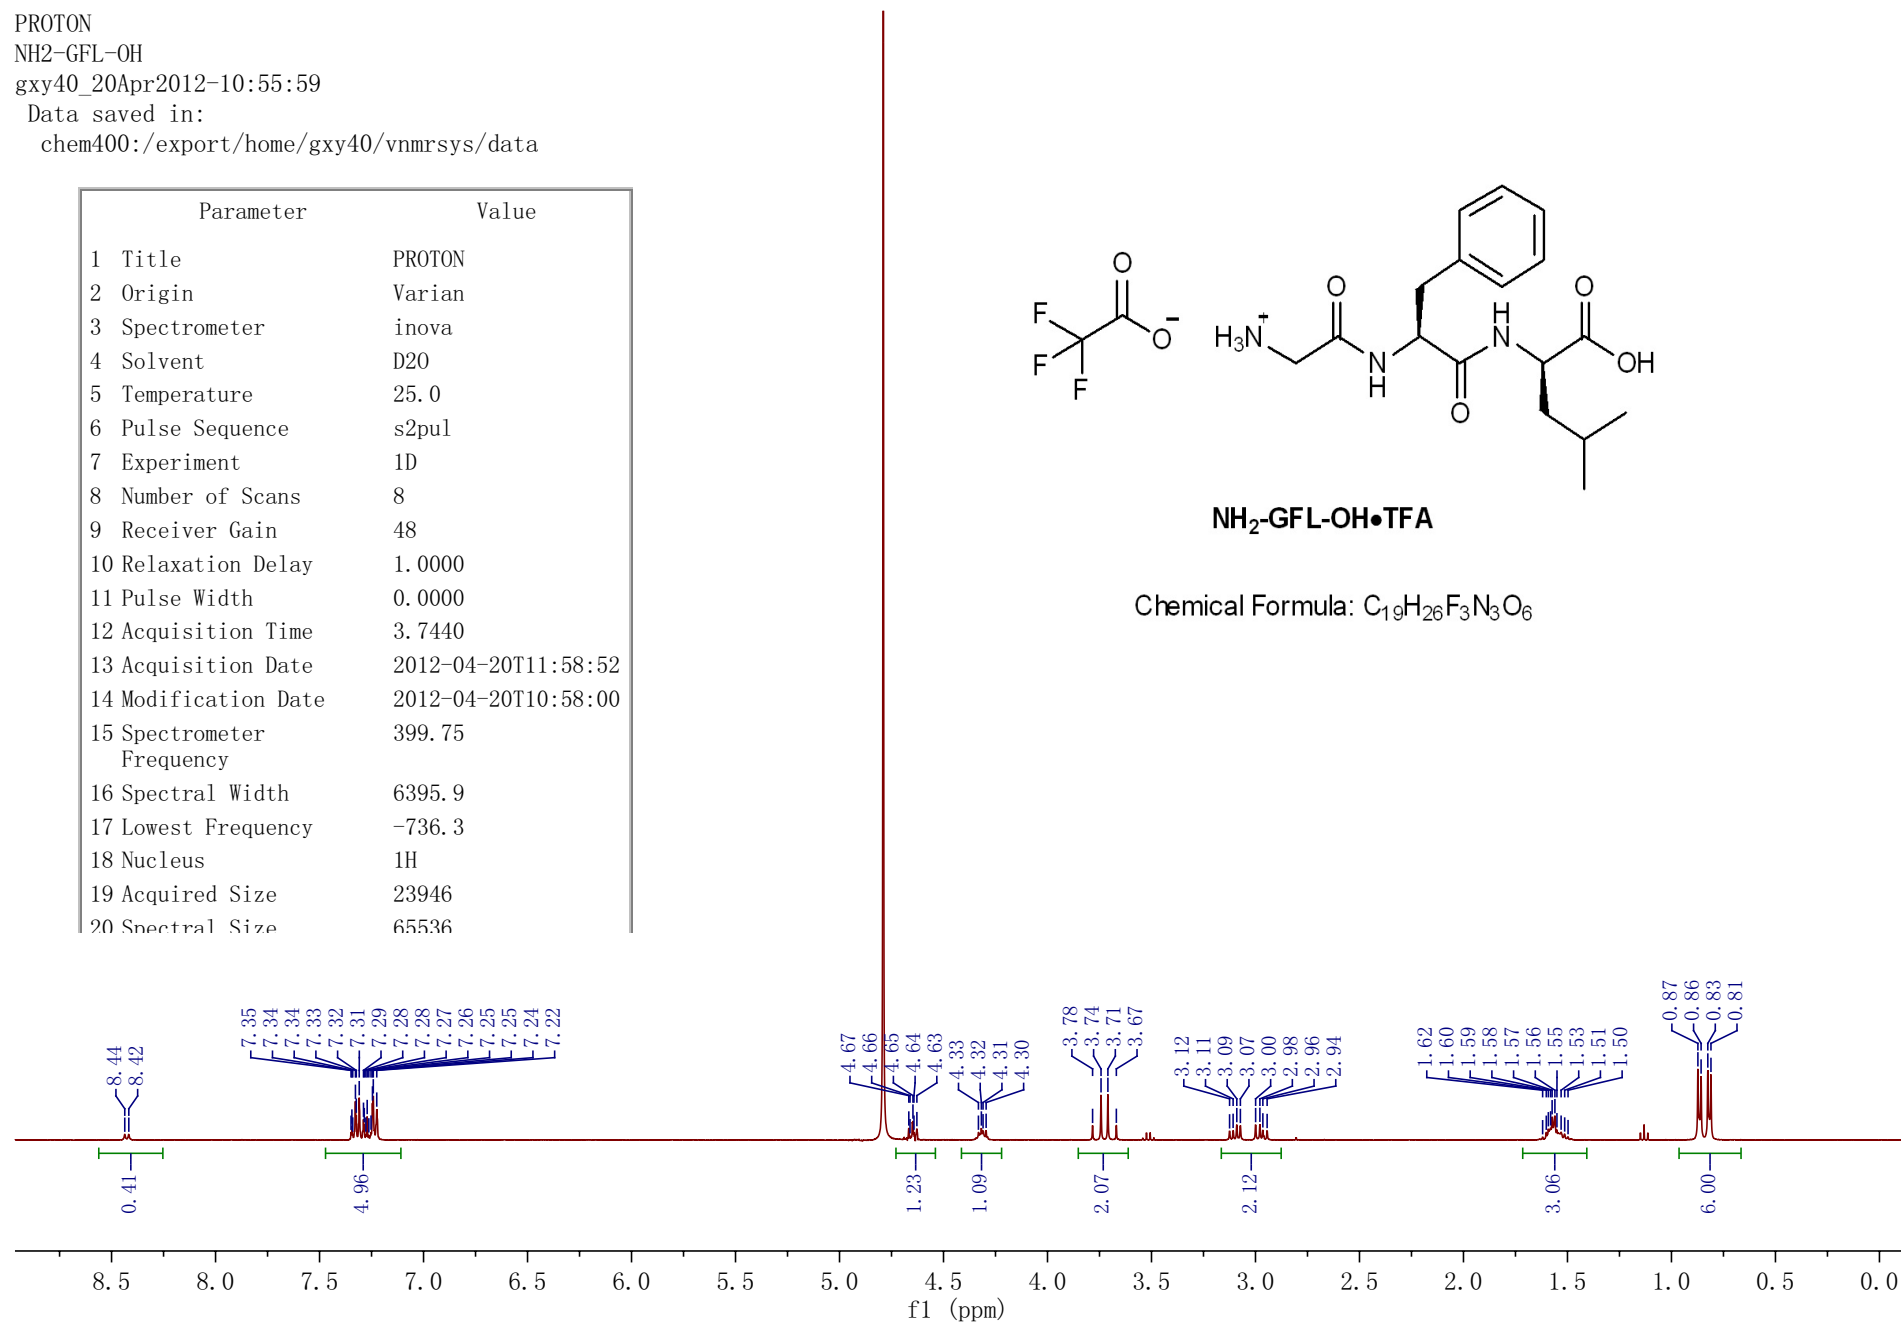

Fig. 2. <sup>1</sup>H NMR spectrum of peptide NH<sub>2</sub>-GFL-OH·TFA

PROTON  
PEG-PA  
Acetone-d6

| Parameter                 | Value               |
|---------------------------|---------------------|
| 1 Title                   | PROTON              |
| 2 Origin                  | Varian              |
| 3 Spectrometer            | inova               |
| 4 Solvent                 | Acetone             |
| 5 Temperature             | 25.0                |
| 6 Pulse Sequence          | s2pul               |
| 7 Experiment              | 1D                  |
| 8 Number of Scans         | 8                   |
| 9 Receiver Gain           | 48                  |
| 10 Relaxation Delay       | 1.0000              |
| 11 Pulse Width            | 0.0000              |
| 12 Acquisition Time       | 3.7440              |
| 13 Acquisition Date       | 2012-06-21T14:57:51 |
| 14 Modification Date      | 2012-06-21T12:57:00 |
| 15 Spectrometer Frequency | 399.75              |
| 16 Spectral Width         | 6395.9              |
| 17 Lowest Frequency       | -799.5              |
| 18 Nucleus                | 1H                  |
| 19 Acquired Size          | 23946               |
| 20 Spectral Size          | 65536               |

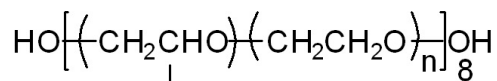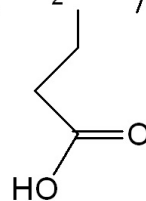

**PEG-8PA**

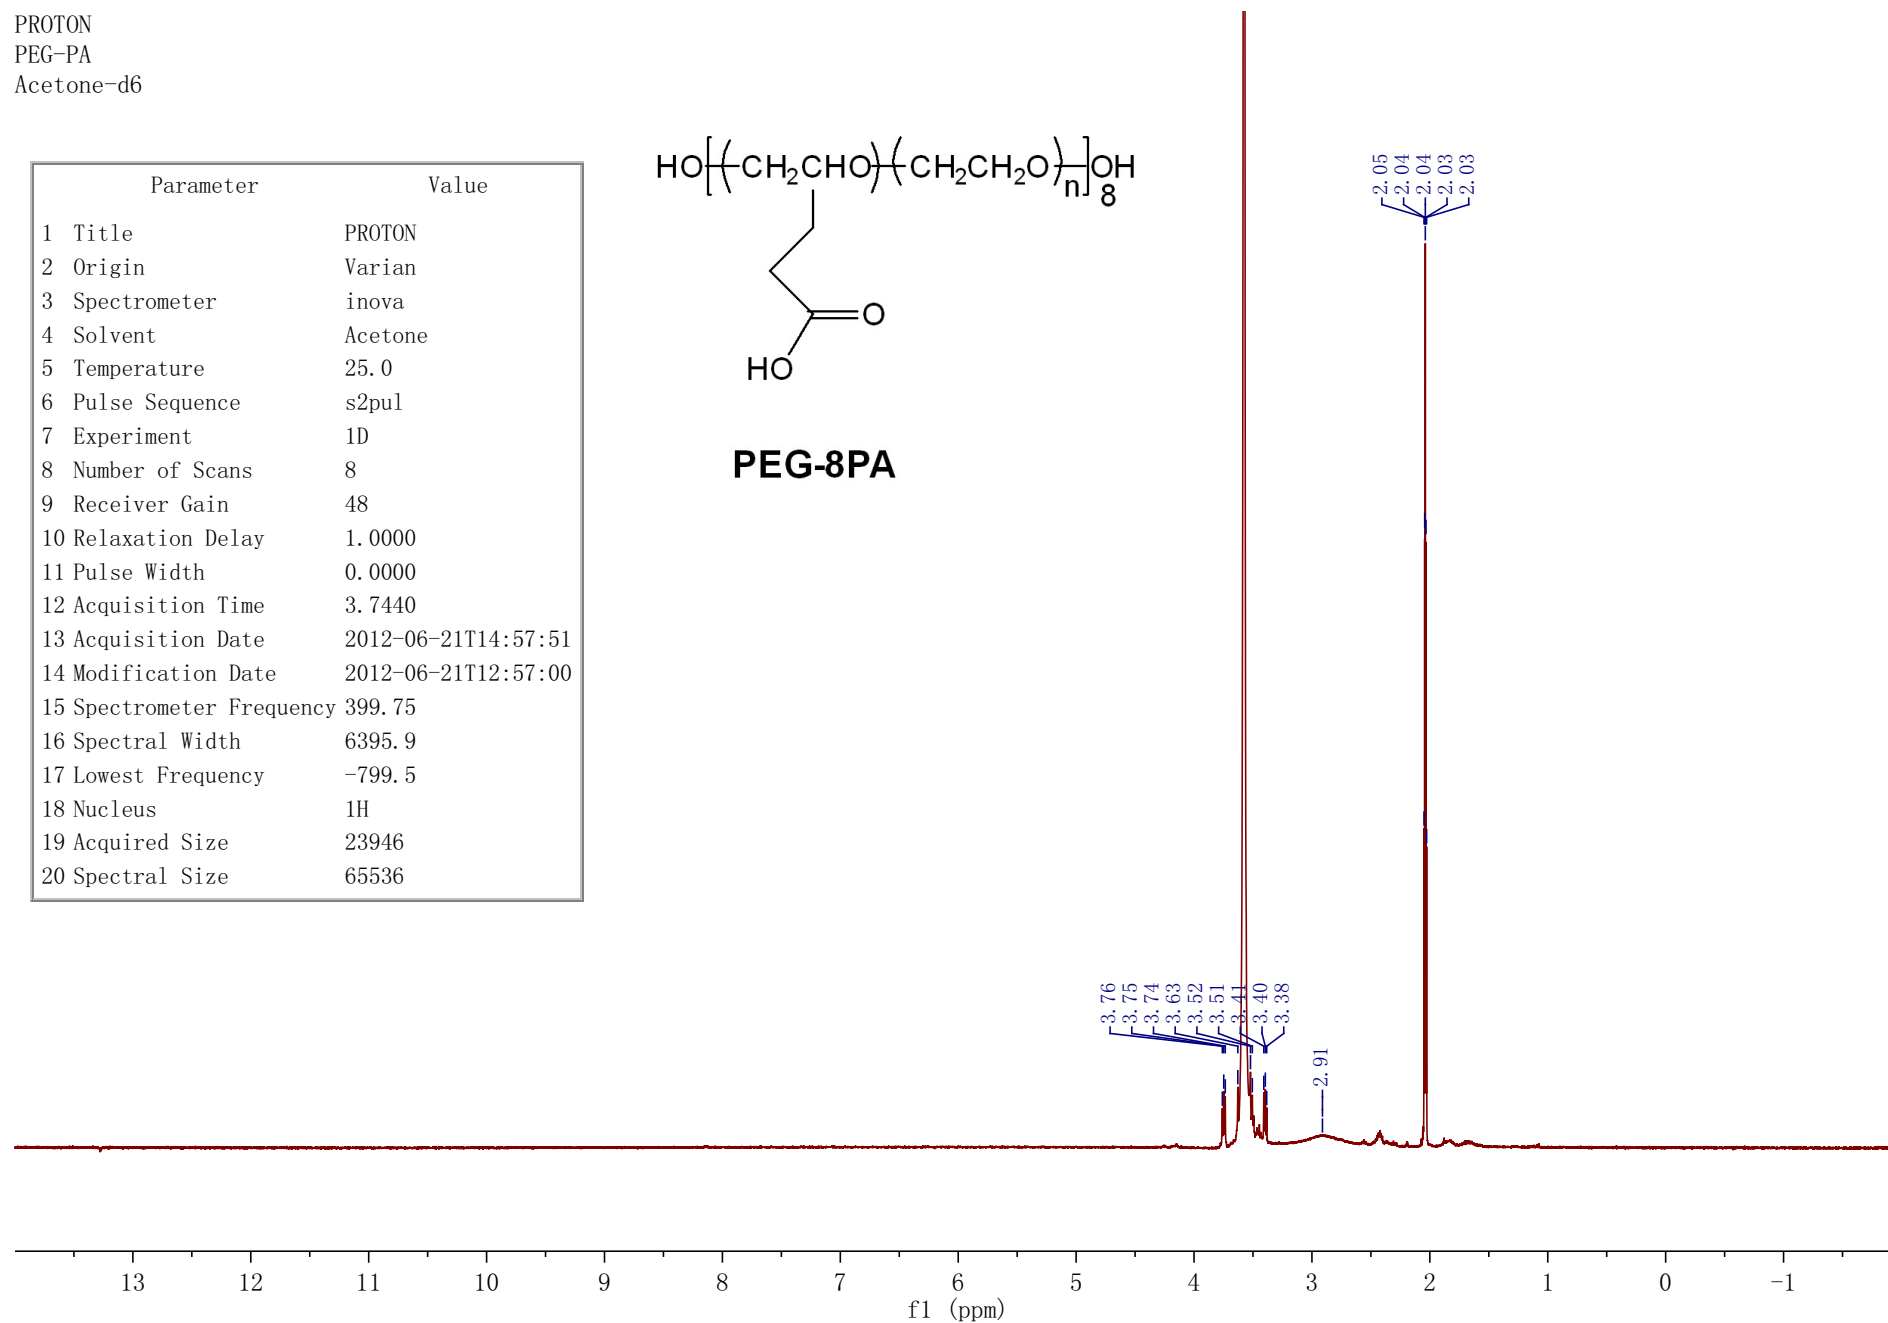

Fig. 3.  $^1\text{H}$  NMR spectrum of starting material PEG-8PA

PROTON  
 PEG-PA-GFL  
 Acetone-d6

| Parameter                 | Value               |
|---------------------------|---------------------|
| 1 Title                   | PROTON              |
| 2 Origin                  | Varian              |
| 3 Spectrometer            | inova               |
| 4 Solvent                 | Acetone             |
| 5 Temperature             | 25.0                |
| 6 Pulse Sequence          | s2pul               |
| 7 Experiment              | 1D                  |
| 8 Number of Scans         | 8                   |
| 9 Receiver Gain           | 48                  |
| 10 Relaxation Delay       | 1.0000              |
| 11 Pulse Width            | 0.0000              |
| 12 Acquisition Time       | 3.7440              |
| 13 Acquisition Date       | 2012-04-23T13:09:16 |
| 14 Modification Date      | 2012-04-23T12:09:00 |
| 15 Spectrometer Frequency | 399.75              |
| 16 Spectral Width         | 6395.9              |
| 17 Lowest Frequency       | -799.5              |
| 18 Nucleus                | 1H                  |
| 19 Acquired Size          | 23946               |
| 20 Spectral Size          | 65536               |

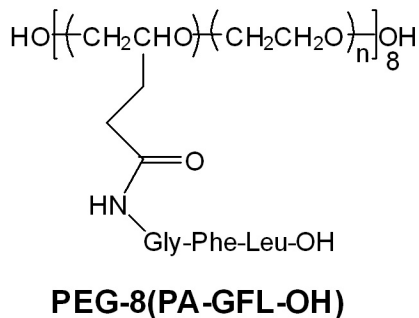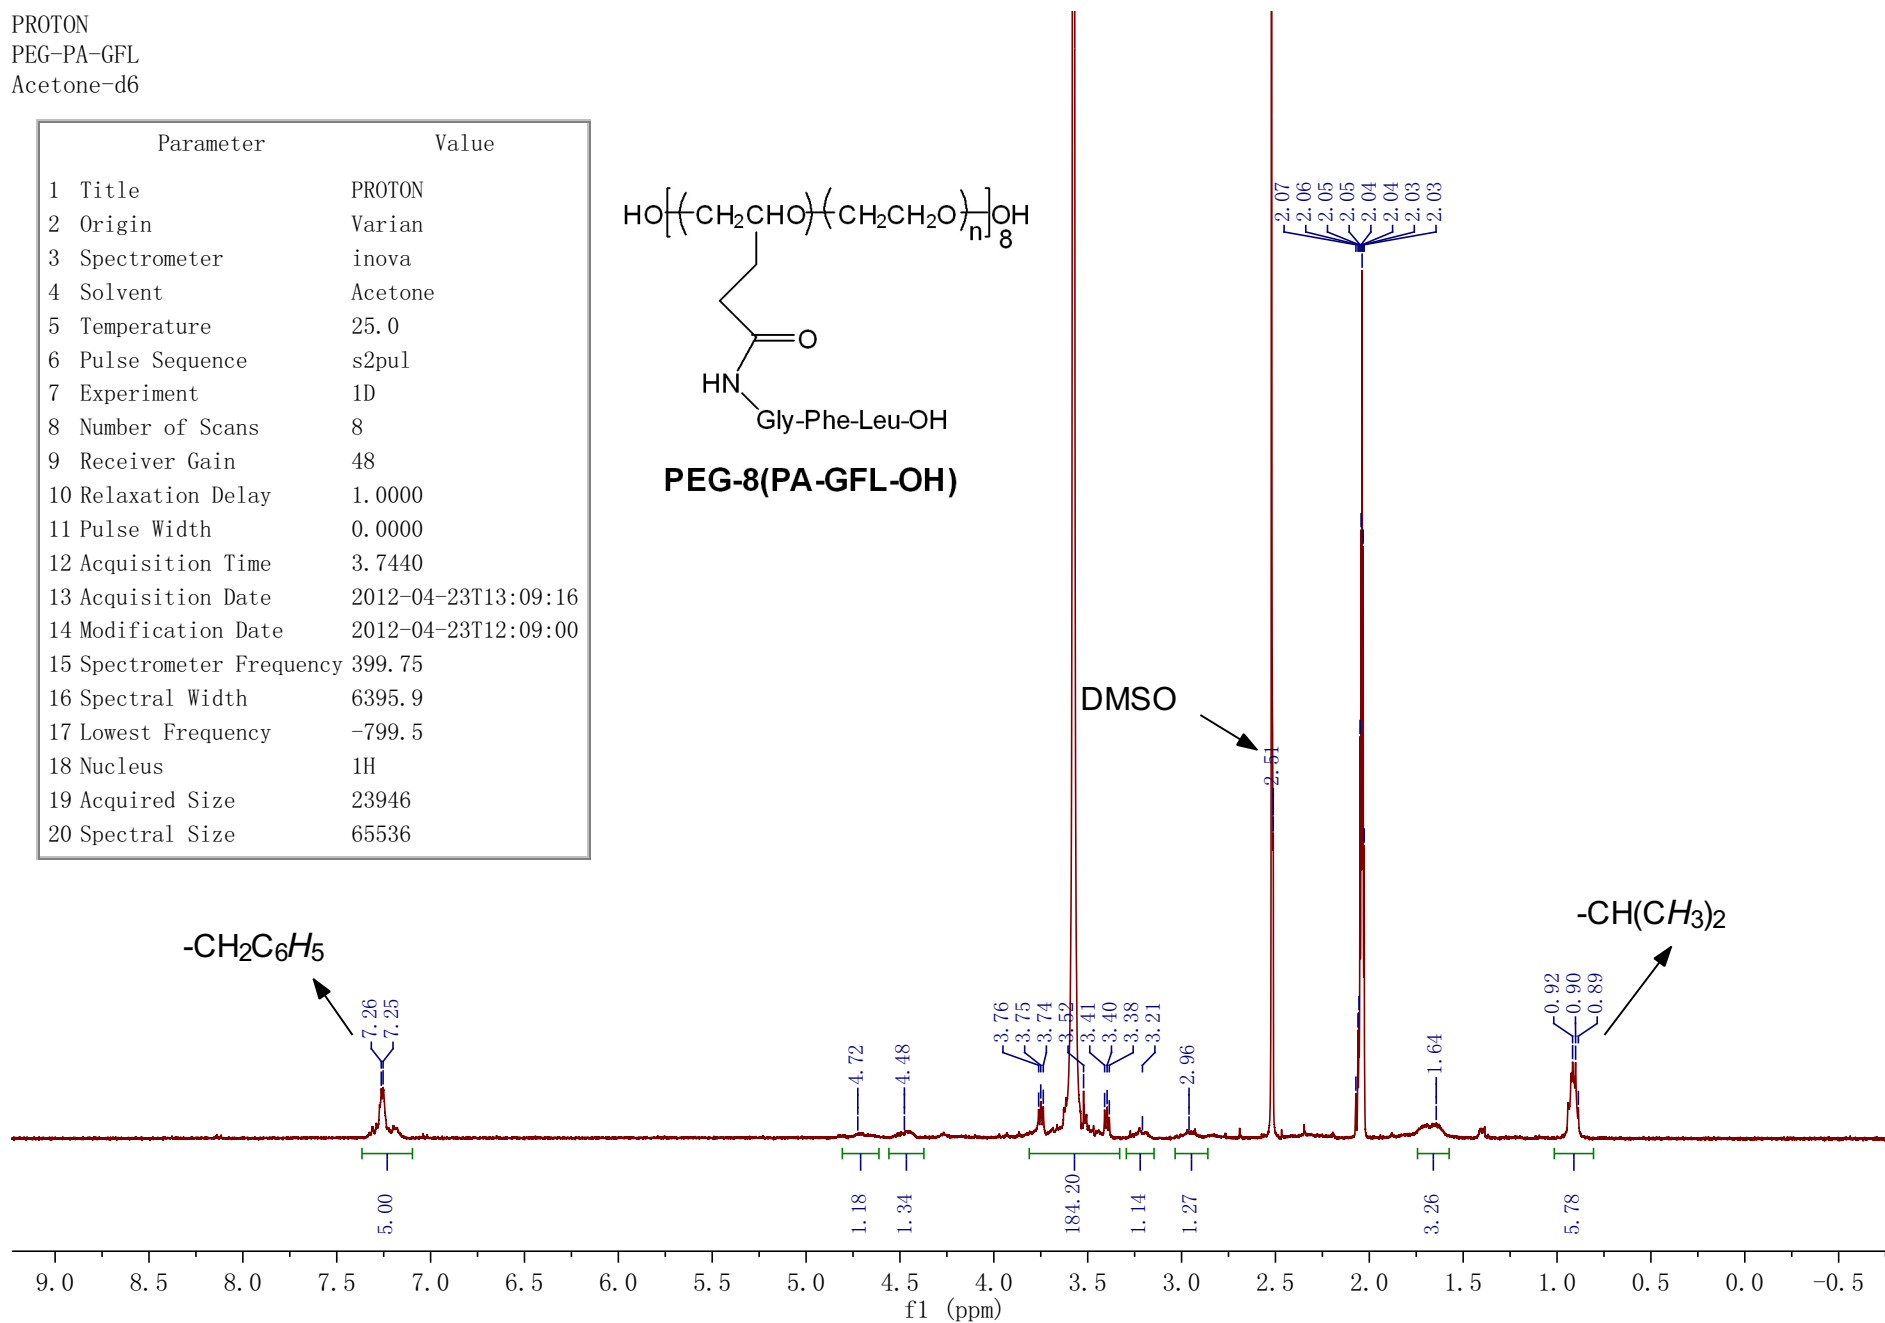

Fig. 4.  $^1\text{H}$  NMR spectrum of intermediate PEG-8(PA-GFL-OH)

PROTON  
 PEG-PA-GFL-RetNH2  
 DMSO-d6

| Parameter                 | Value               |
|---------------------------|---------------------|
| 1 Title                   | PROTON              |
| 2 Origin                  | Varian              |
| 3 Spectrometer            | inova               |
| 4 Solvent                 | DMSO                |
| 5 Temperature             | 25.0                |
| 6 Pulse Sequence          | s2pul               |
| 7 Experiment              | 1D                  |
| 8 Number of Scans         | 8                   |
| 9 Receiver Gain           | 44                  |
| 10 Relaxation Delay       | 1.0000              |
| 11 Pulse Width            | 0.0000              |
| 12 Acquisition Time       | 3.7440              |
| 13 Acquisition Date       | 2013-11-14T13:21:41 |
| 14 Modification Date      | 2013-11-14T13:21:44 |
| 15 Spectrometer Frequency | 399.74              |
| 16 Spectral Width         | 6395.9              |
| 17 Lowest Frequency       | -799.5              |
| 18 Nucleus                | 1H                  |
| 19 Acquired Size          | 23946               |
| 20 Spectral Size          | 65536               |

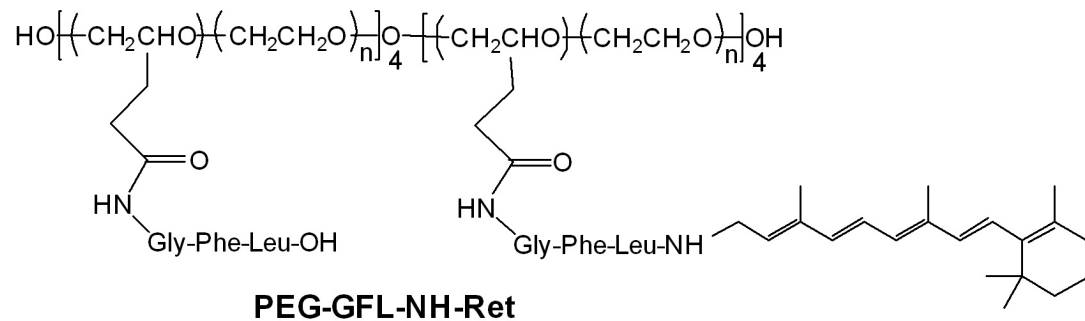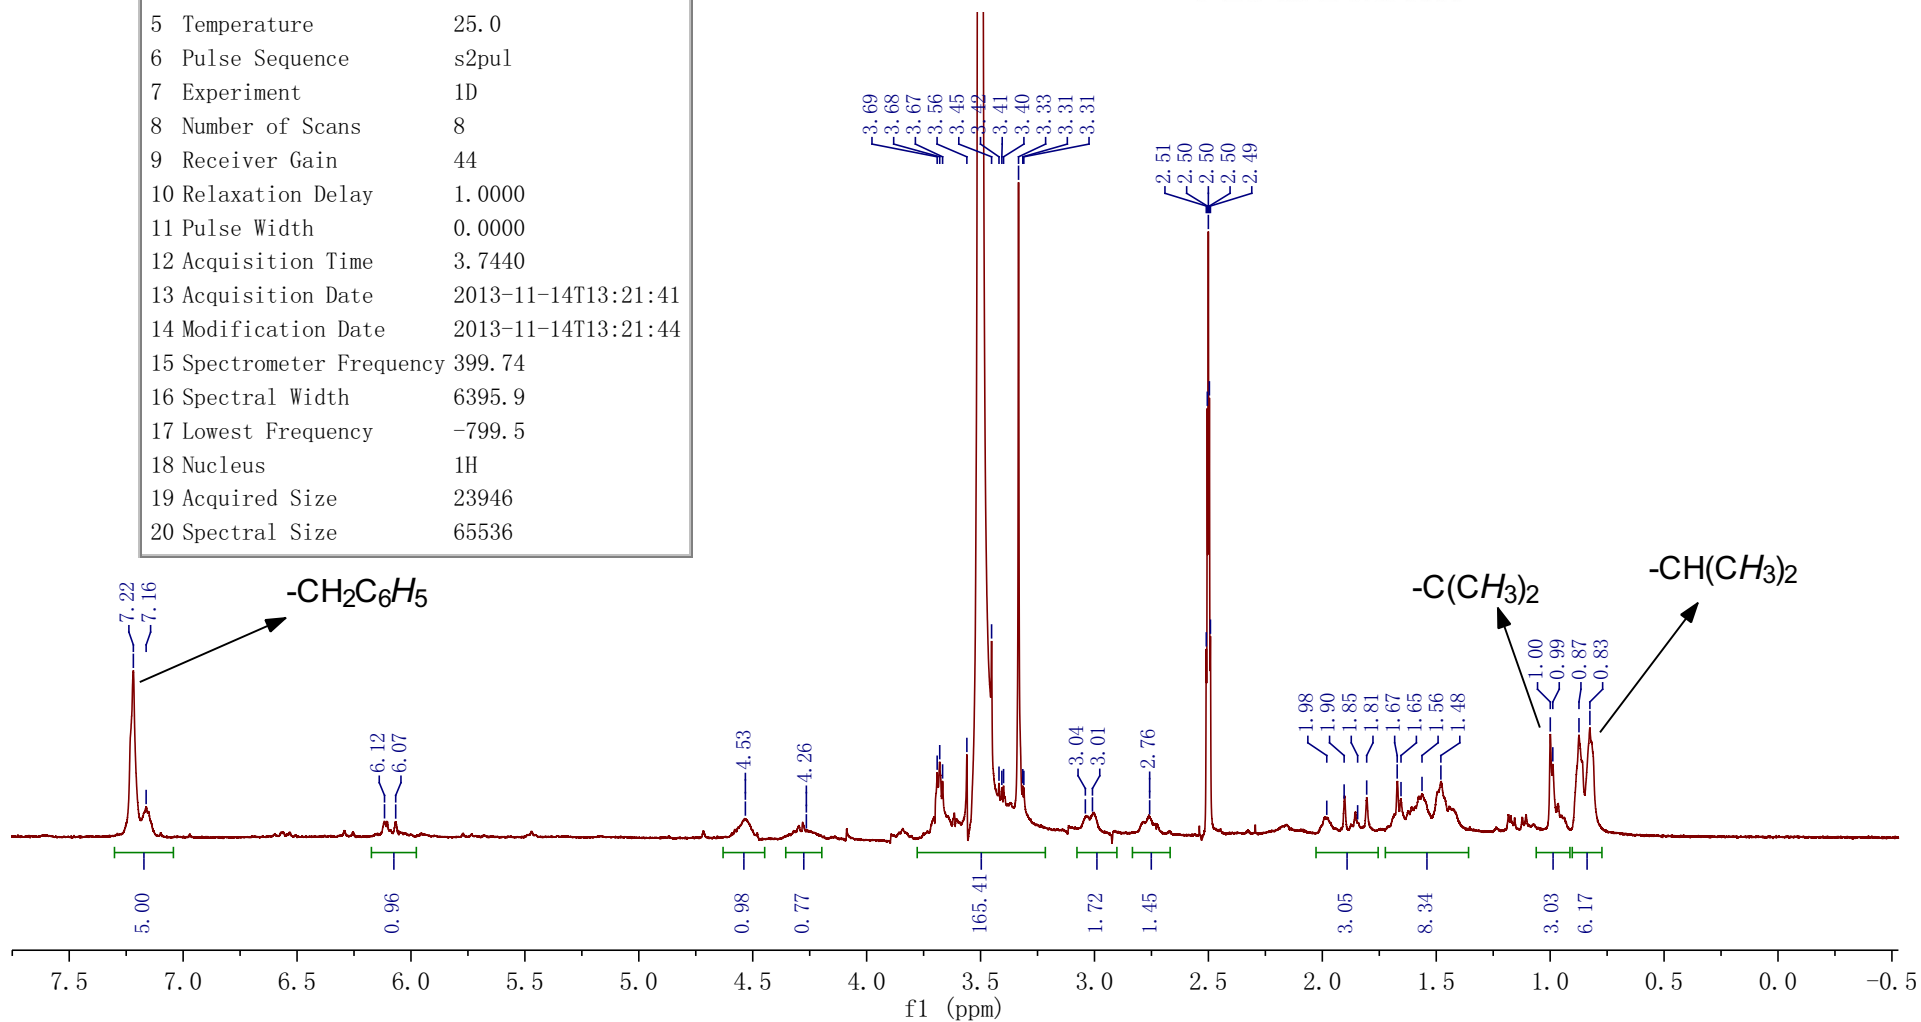

Fig. 5. <sup>1</sup>H NMR spectrum of PEG-GFL-NH-Ret conjugate

PROTON  
pNA-110214  
gxy40\_02Nov2014  
Data saved in:  
chem400:/export/home/gxy40/vnmrsys/data

| Parameter                 | Value               |
|---------------------------|---------------------|
| 1 Title                   | PROTON              |
| 2 Origin                  | Varian              |
| 3 Spectrometer            | inova               |
| 4 Solvent                 | Acetone             |
| 5 Temperature             | 25.0                |
| 6 Pulse Sequence          | s2pul               |
| 7 Experiment              | 1D                  |
| 8 Number of Scans         | 8                   |
| 9 Receiver Gain           | 60                  |
| 10 Relaxation Delay       | 1.0000              |
| 11 Pulse Width            | 0.0000              |
| 12 Acquisition Time       | 3.7440              |
| 13 Acquisition Date       | 2014-11-02T15:05:37 |
| 14 Modification Date      | 2014-11-02T15:05:40 |
| 15 Spectrometer Frequency | 399.74              |
| 16 Spectral Width         | 6395.9              |
| 17 Lowest Frequency       | -799.5              |
| 18 Nucleus                | $^1\text{H}$        |
| 19 Acquired Size          | 23946               |
| 20 Spectral Size          | 65536               |

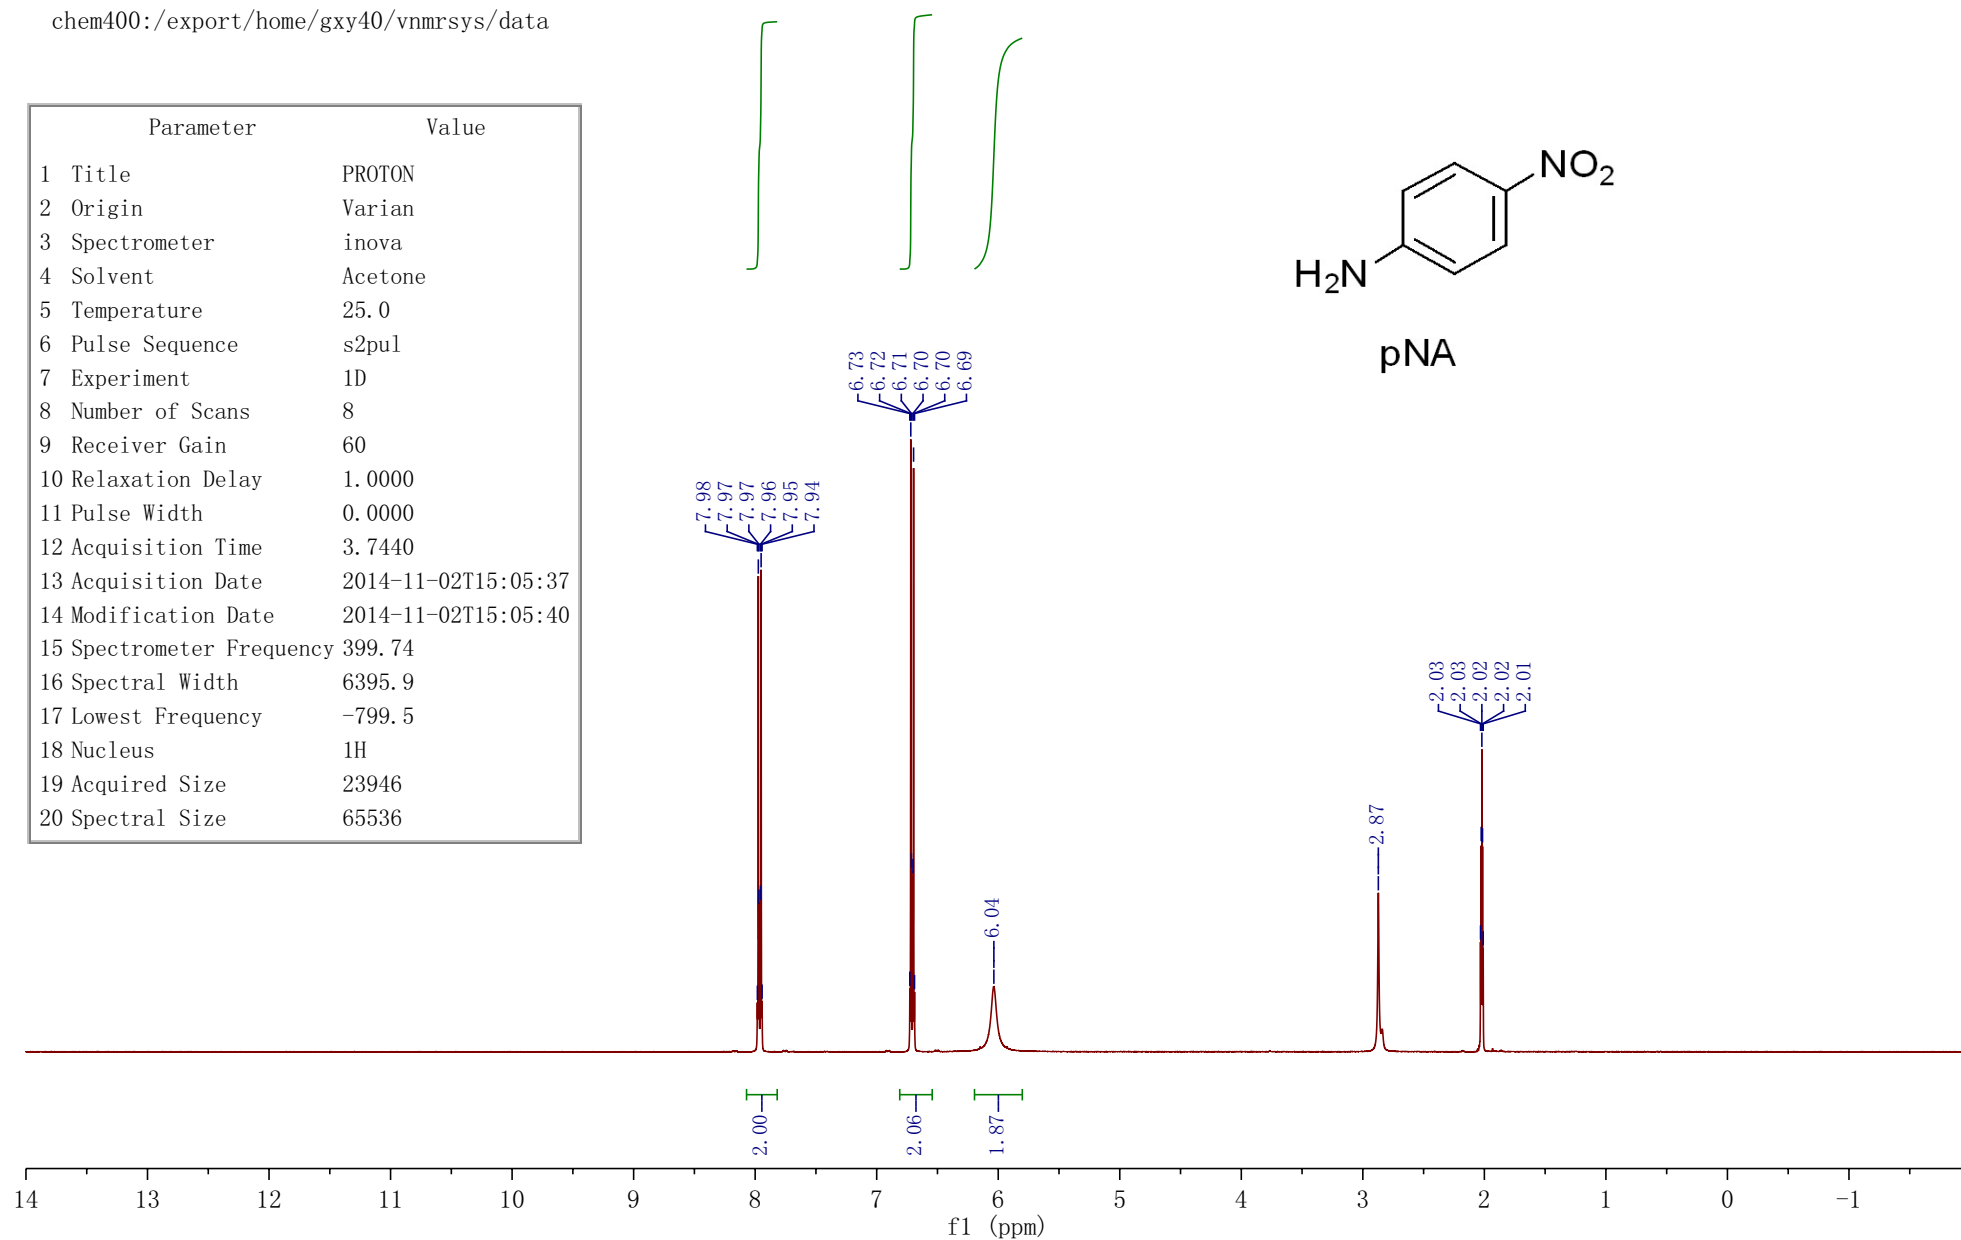

Fig. 6.  $^1\text{H}$  NMR spectrum of *p*-nitroaniline (pNA)



PROTON  
 Leu-pNA-110214  
 gxy40\_02Nov2014-15:06:21  
 Data saved in:  
 chem400:/export/home/gxy40/vnmrsys/data

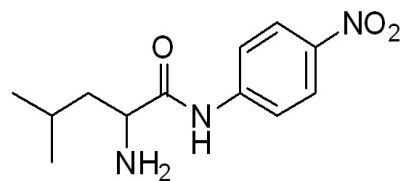

Leu-pNA

| Parameter                 | Value               |
|---------------------------|---------------------|
| 1 Title                   | PROTON              |
| 2 Origin                  | Varian              |
| 3 Spectrometer            | inova               |
| 4 Solvent                 | Acetone             |
| 5 Temperature             | 25.0                |
| 6 Pulse Sequence          | s2pul               |
| 7 Experiment              | 1D                  |
| 8 Number of Scans         | 8                   |
| 9 Receiver Gain           | 58                  |
| 10 Relaxation Delay       | 1.0000              |
| 11 Pulse Width            | 0.0000              |
| 12 Acquisition Time       | 3.7440              |
| 13 Acquisition Date       | 2014-11-02T15:10:34 |
| 14 Modification Date      | 2014-11-02T15:10:38 |
| 15 Spectrometer Frequency | 399.74              |
| 16 Spectral Width         | 6395.9              |
| 17 Lowest Frequency       | -799.5              |
| 18 Nucleus                | <sup>1</sup> H      |
| 19 Acquired Size          | 23946               |
| 20 Spectral Size          | 65536               |

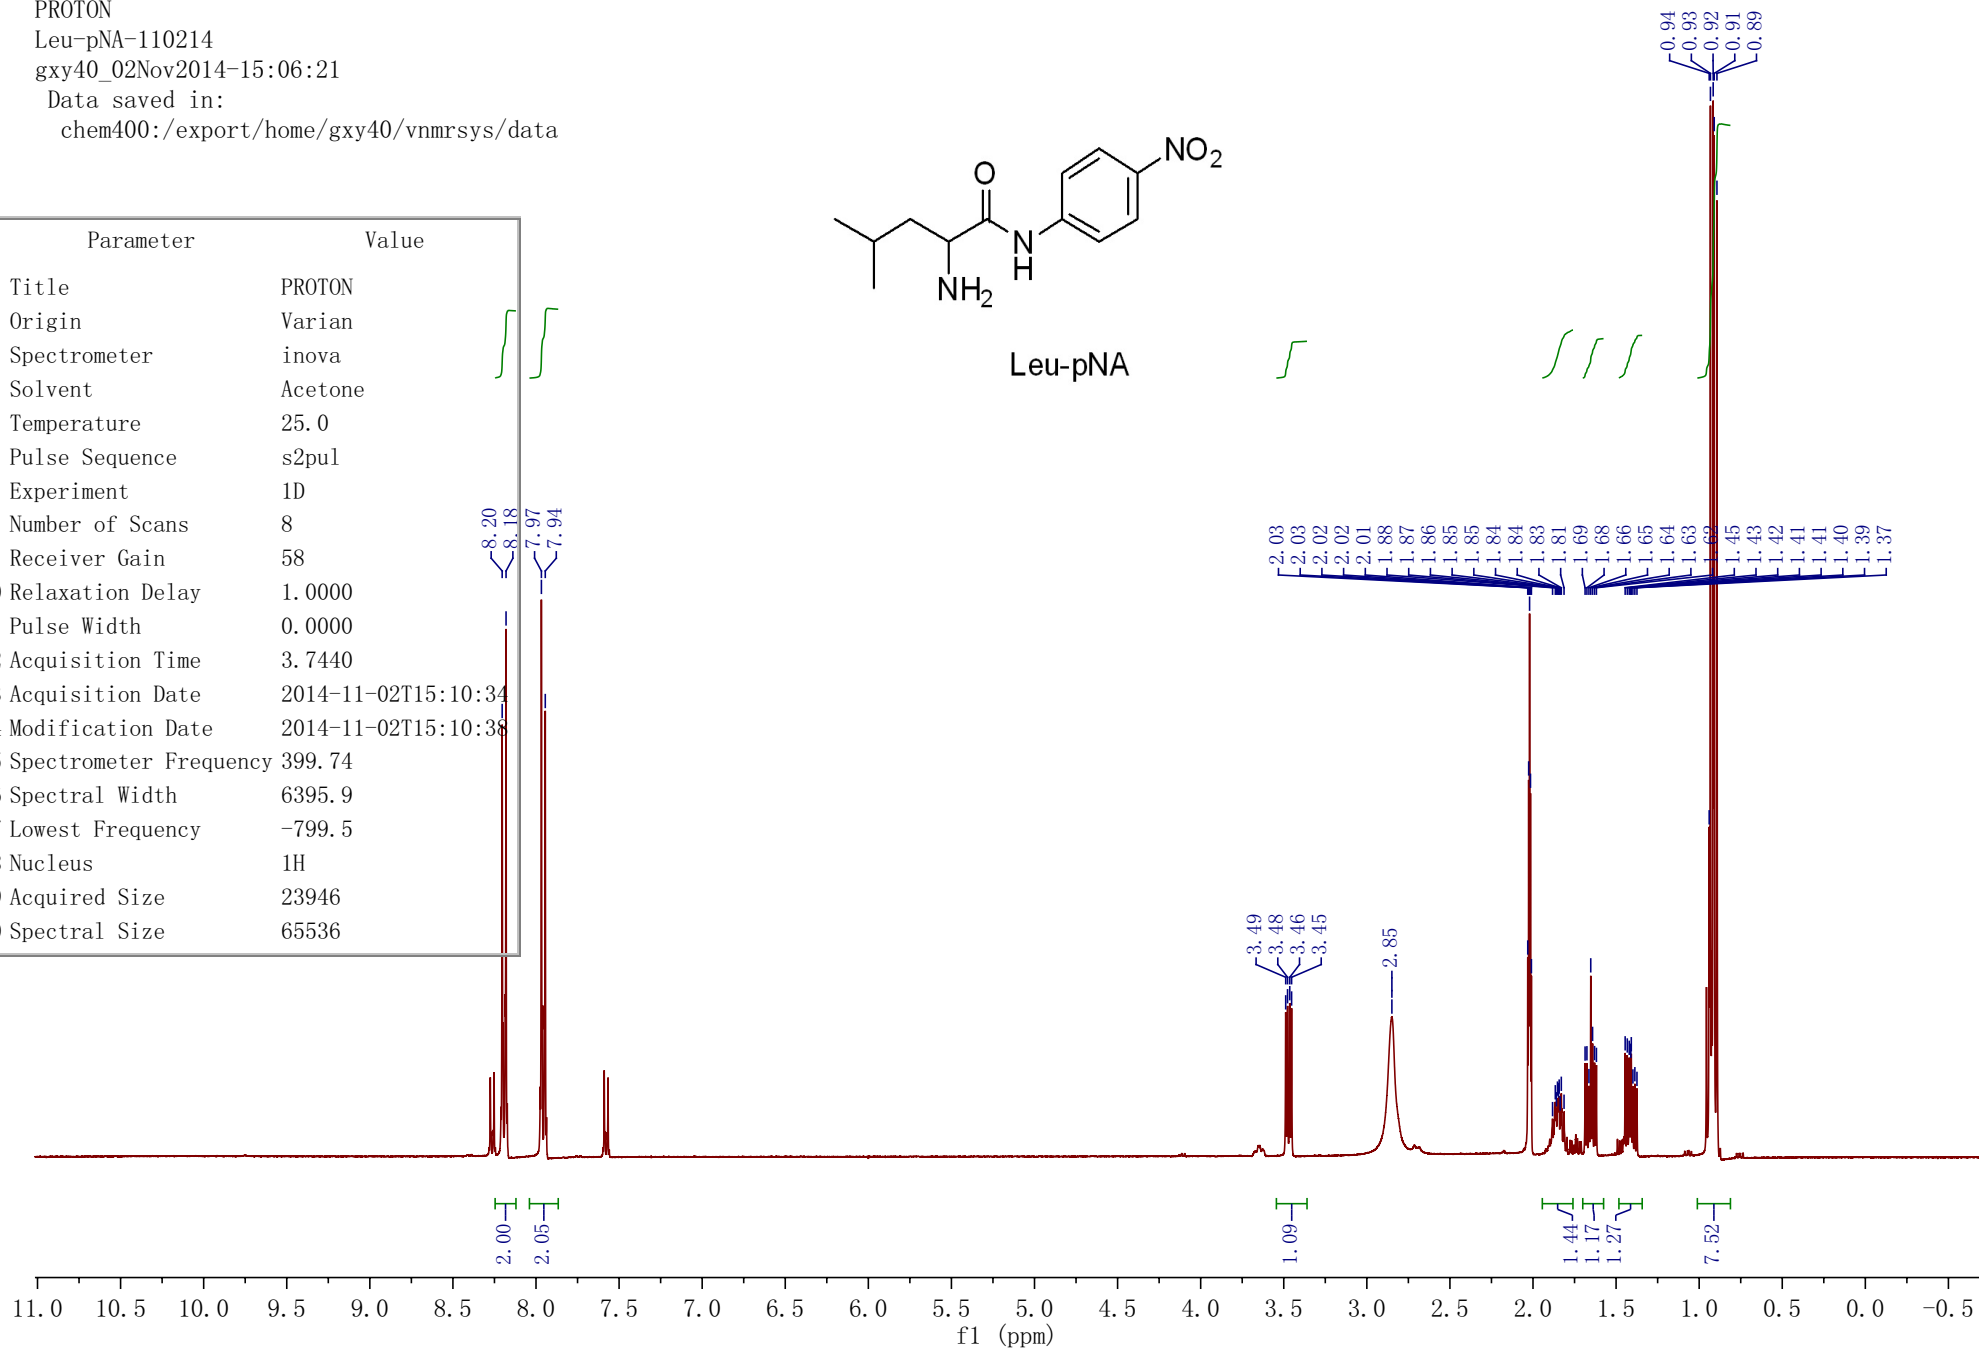

Fig. 7. <sup>1</sup>H NMR spectrum of Leu-pNA

PROTON  
GF.TFA-062512  
gxy40\_25Jun2012  
Data saved in:  
chem400:/export/home/gxy40/vnmrsys/data

| Parameter                 | Value               |
|---------------------------|---------------------|
| 1 Title                   | PROTON              |
| 2 Origin                  | Varian              |
| 3 Spectrometer            | inova               |
| 4 Solvent                 | D2O                 |
| 5 Temperature             | 25.0                |
| 6 Pulse Sequence          | s2pul               |
| 7 Experiment              | 1D                  |
| 8 Number of Scans         | 8                   |
| 9 Receiver Gain           | 38                  |
| 10 Relaxation Delay       | 1.0000              |
| 11 Pulse Width            | 0.0000              |
| 12 Acquisition Time       | 3.7440              |
| 13 Acquisition Date       | 2012-06-25T18:43:52 |
| 14 Modification Date      | 2012-06-25T17:43:00 |
| 15 Spectrometer Frequency | 399.73              |
| 16 Spectral Width         | 6395.9              |
| 17 Lowest Frequency       | -799.4              |
| 18 Nucleus                | 1H                  |
| 19 Acquired Size          | 23946               |
| 20 Spectral Size          | 65536               |

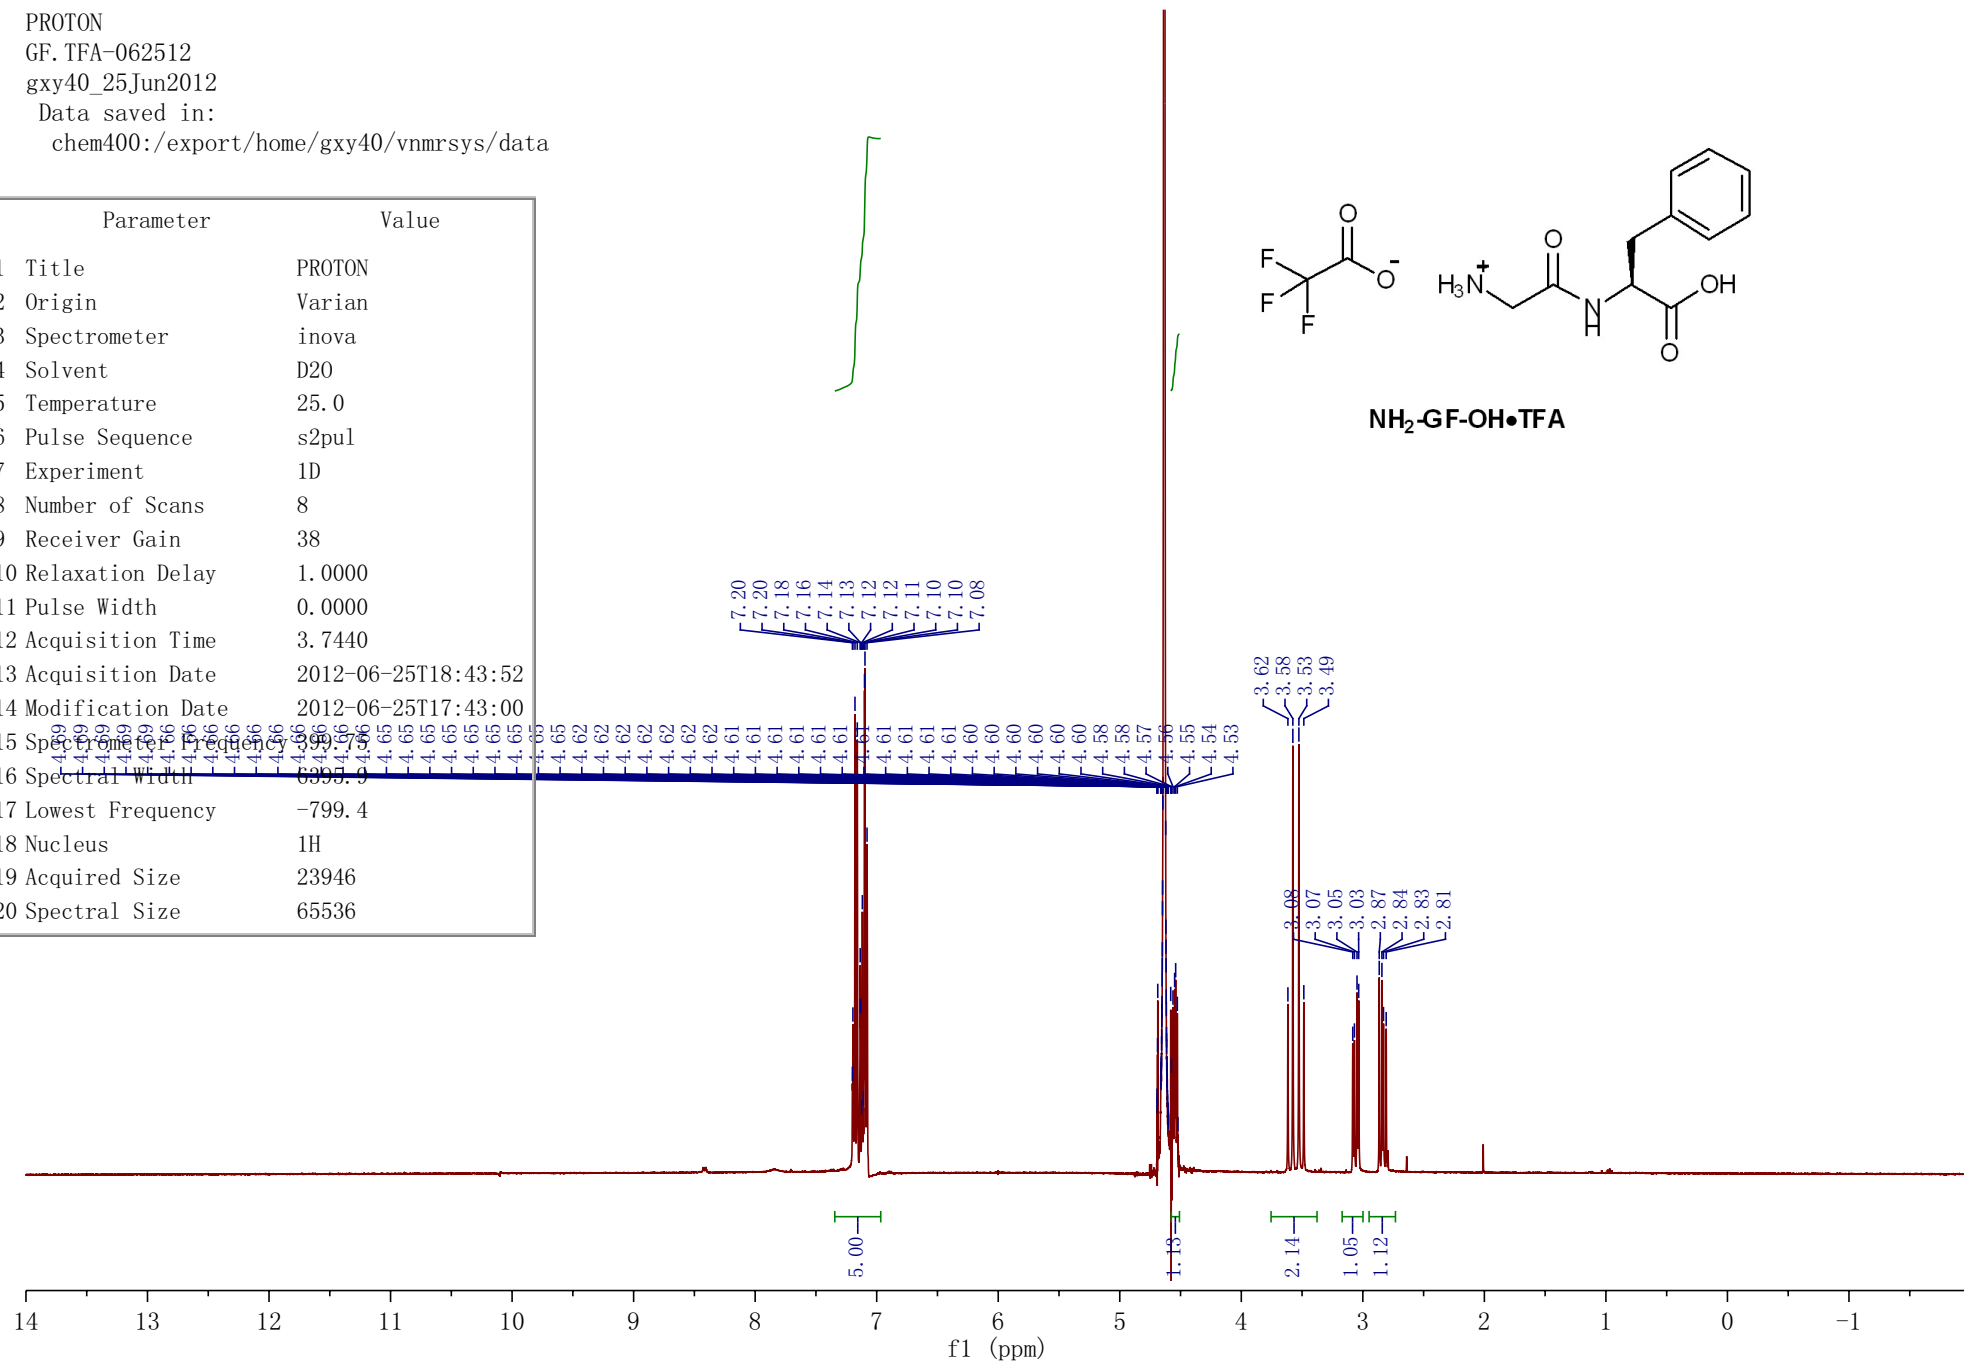

Fig. 8. <sup>1</sup>H NMR spectrum of peptide NH<sub>2</sub>-GF-OH·TFA

PROTON  
 PEG-GF-110214  
 gxy40\_02Nov2014-15:14:53  
 Data saved in:  
 chem400:/export/home/gxy40/vnmrsys/data

| Parameter                 | Value               |
|---------------------------|---------------------|
| 1 Title                   | PROTON              |
| 2 Origin                  | Varian              |
| 3 Spectrometer            | inova               |
| 4 Solvent                 | Acetone             |
| 5 Temperature             | 25.0                |
| 6 Pulse Sequence          | s2pul               |
| 7 Experiment              | 1D                  |
| 8 Number of Scans         | 8                   |
| 9 Receiver Gain           | 44                  |
| 10 Relaxation Delay       | 1.0000              |
| 11 Pulse Width            | 0.0000              |
| 12 Acquisition Time       | 3.7440              |
| 13 Acquisition Date       | 2014-11-02T15:17:16 |
| 14 Modification Date      | 2014-11-02T15:17:20 |
| 15 Spectrometer Frequency | 399.74              |
| 16 Spectral Width         | 6395.9              |
| 17 Lowest Frequency       | -799.5              |
| 18 Nucleus                | 1H                  |
| 19 Acquired Size          | 23946               |
| 20 Spectral Size          | 65536               |

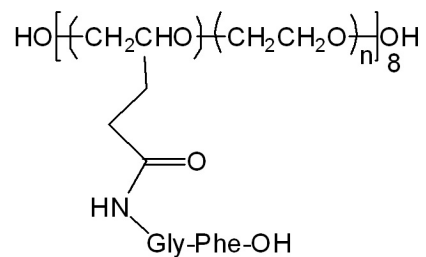

**PEG-8(PA-GF-OH)**

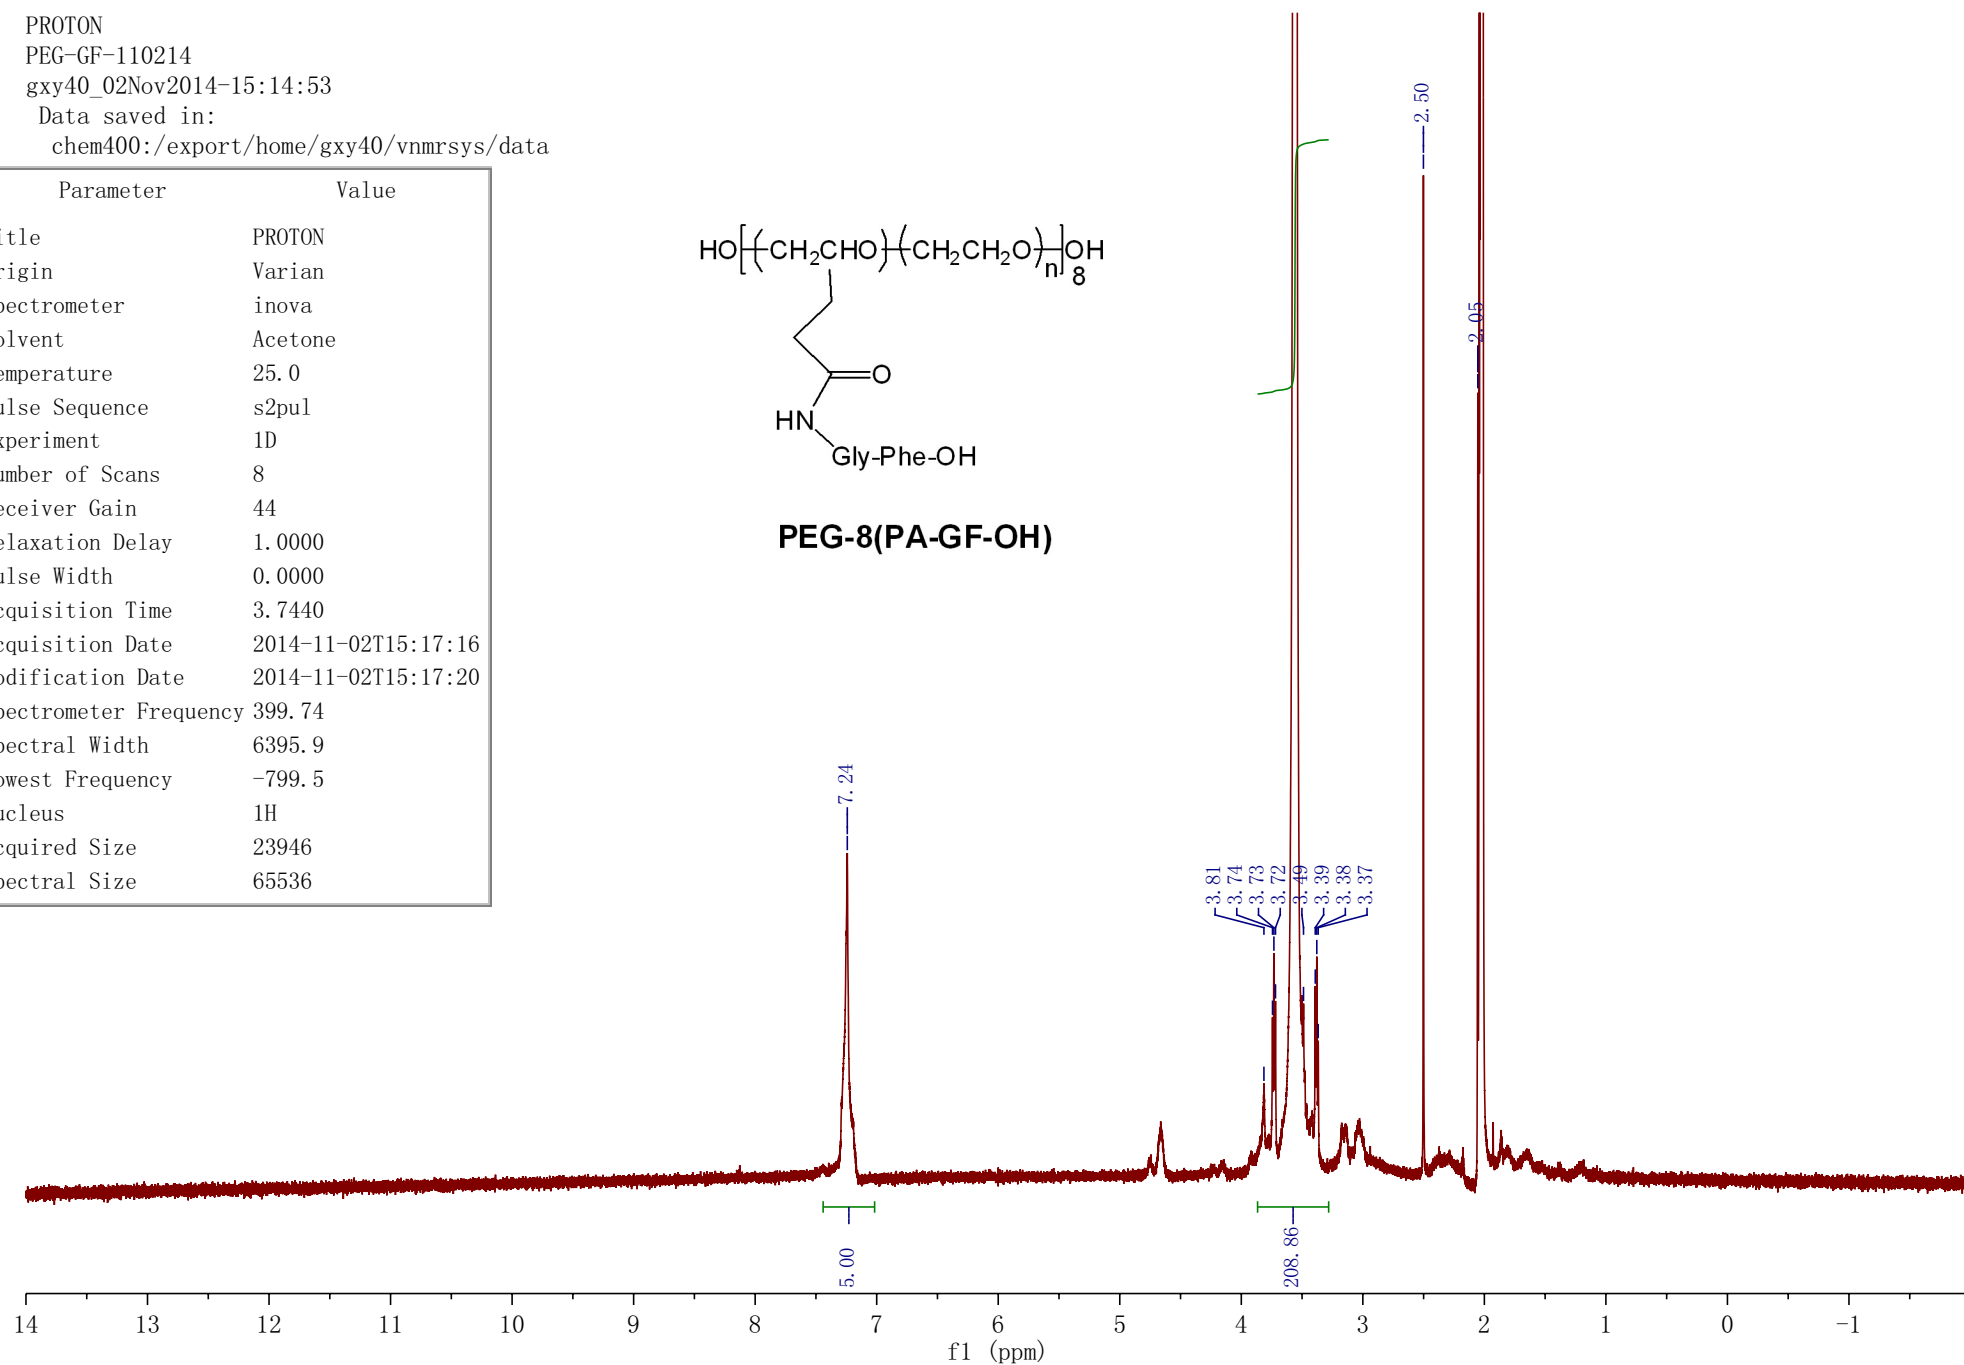

Fig. 9.  $^1\text{H}$  NMR spectrum of intermediate PEG-8(PA-GF-OH)

PROTON  
 PEG-GFL-pNA-110314  
 gxy40\_03Nov2014  
 Data saved in:  
 chem400:/export/home/gxy40/vnmrsys/data

| Parameter                 | Value               |
|---------------------------|---------------------|
| 1 Title                   | PROTON              |
| 2 Origin                  | Varian              |
| 3 Spectrometer            | inova               |
| 4 Solvent                 | Acetone             |
| 5 Temperature             | 25.0                |
| 6 Pulse Sequence          | s2pul               |
| 7 Experiment              | 1D                  |
| 8 Number of Scans         | 8                   |
| 9 Receiver Gain           | 44                  |
| 10 Relaxation Delay       | 1.0000              |
| 11 Pulse Width            | 0.0000              |
| 12 Acquisition Time       | 3.7440              |
| 13 Acquisition Date       | 2014-11-03T14:58:18 |
| 14 Modification Date      | 2014-11-03T14:58:22 |
| 15 Spectrometer Frequency | 399.74              |
| 16 Spectral Width         | 6395.9              |
| 17 Lowest Frequency       | -799.5              |
| 18 Nucleus                | 1H                  |
| 19 Acquired Size          | 23946               |
| 20 Spectral Size          | 65536               |

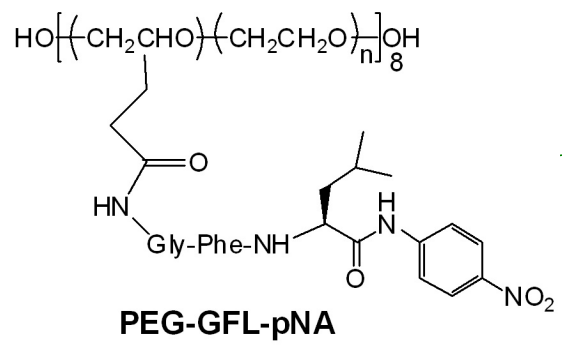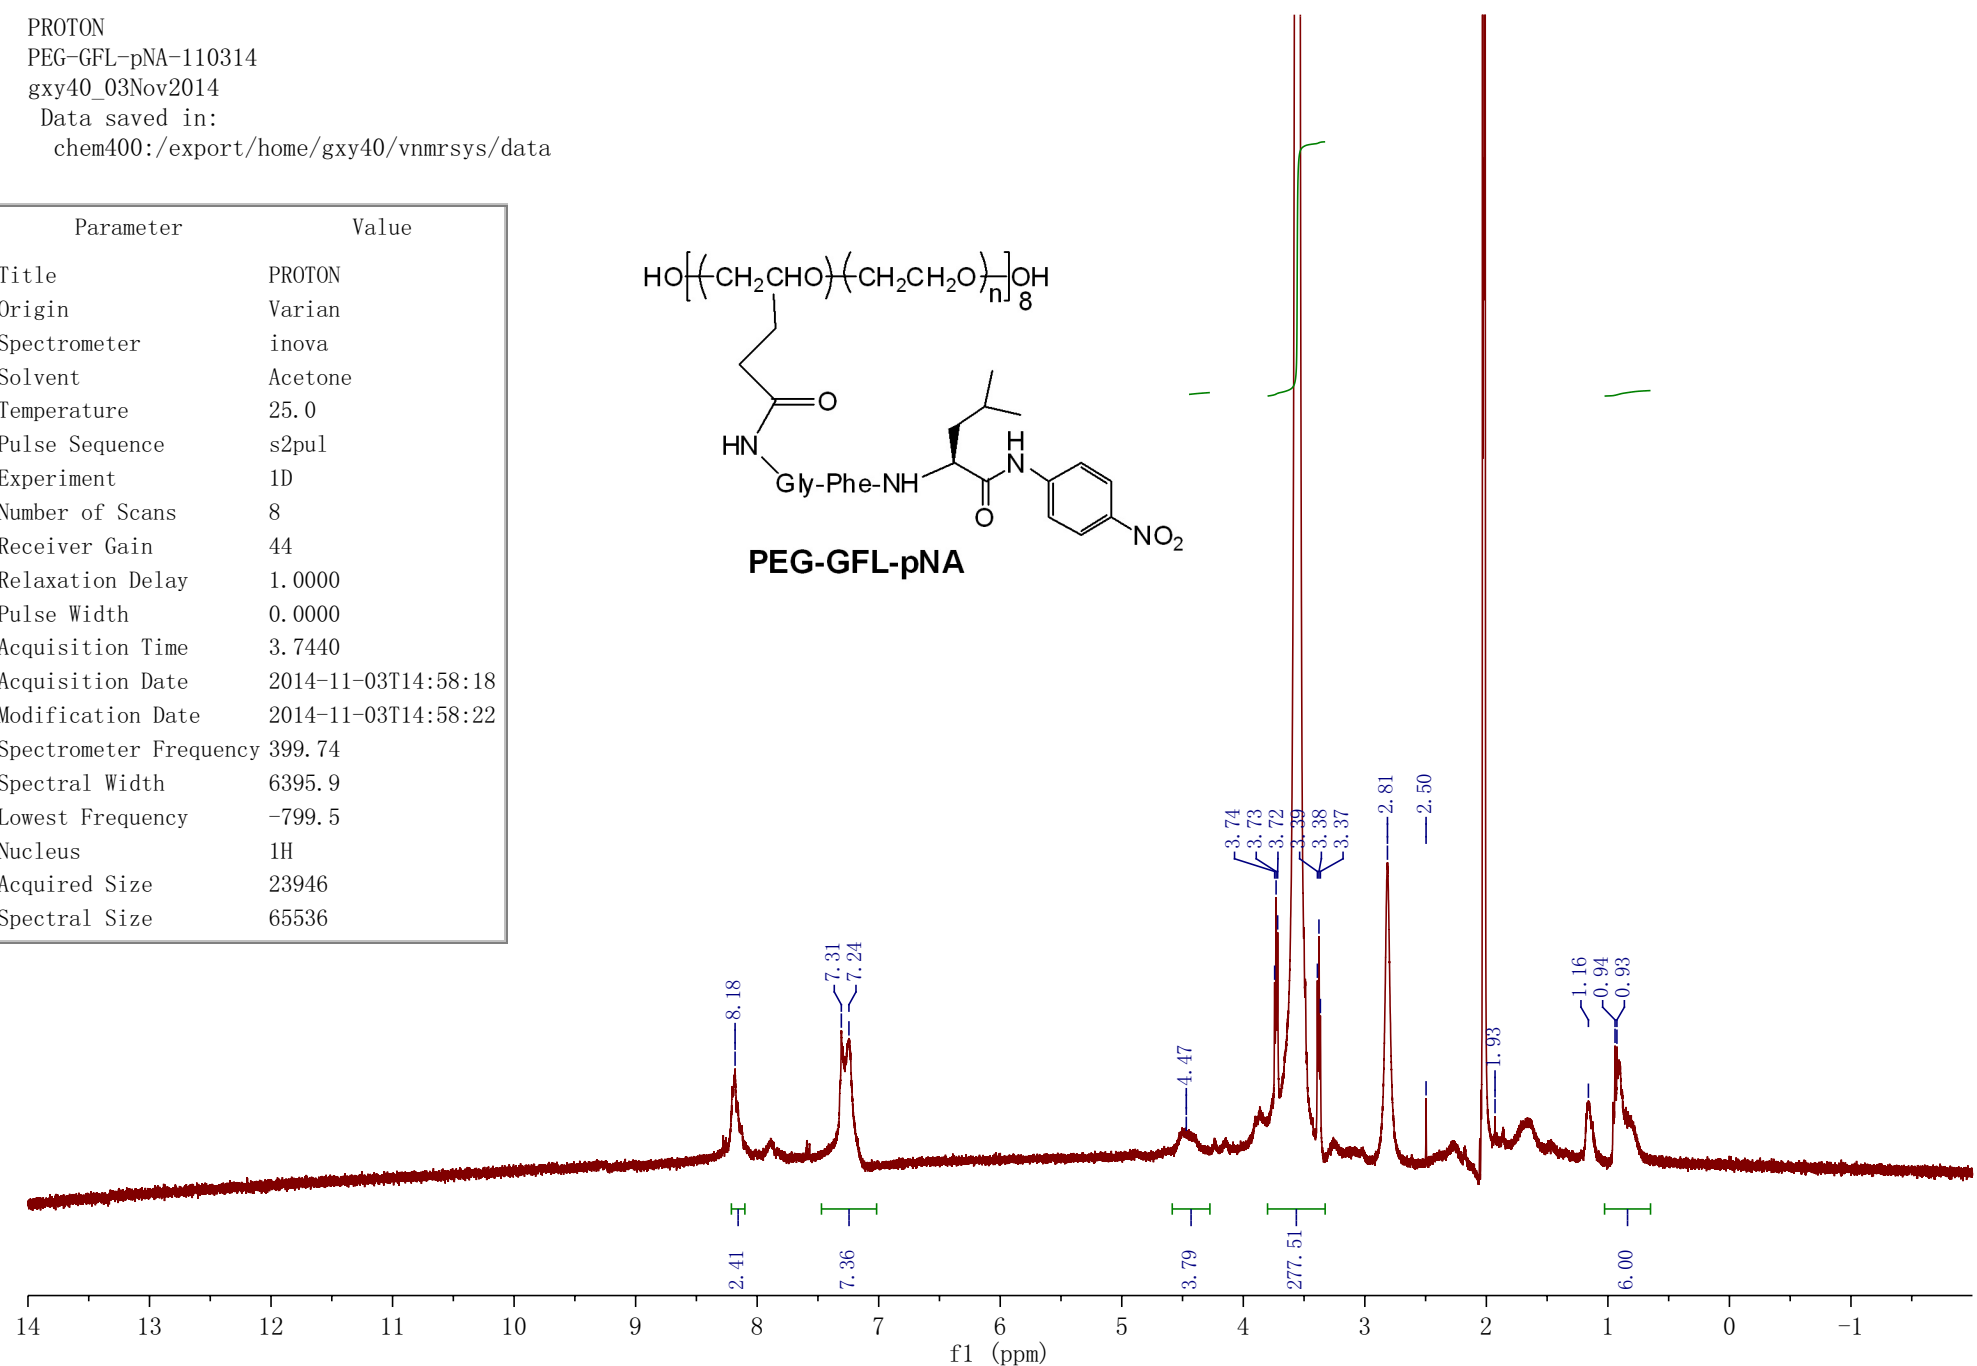

Fig. 10. <sup>1</sup>H NMR spectrum of PEG-GFL-pNA conjugate

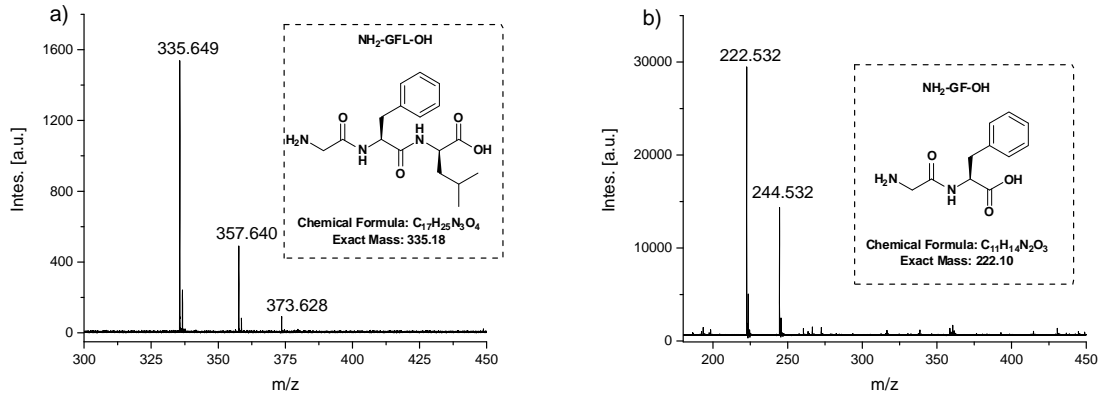

Fig 11. MALDI-TOF spectrum of peptide linker. a) NH<sub>2</sub>-GFL-OH, b) NH<sub>2</sub>-GF-OH

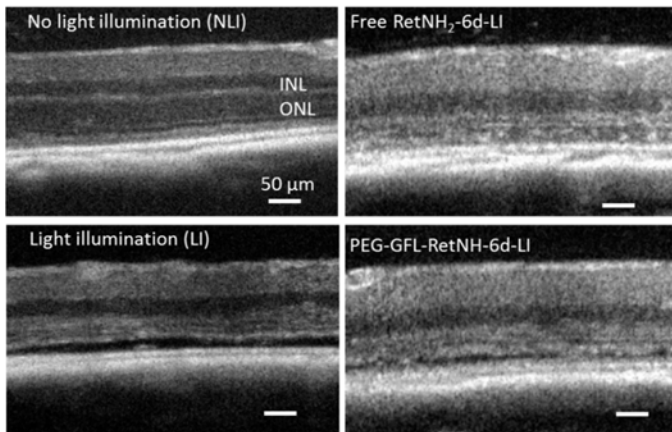

Fig. 12. OCT images indicate representative morphology of *Abca4*<sup>-/-</sup>*Rdh8*<sup>-/-</sup> mouse retinas for 6 day pretreatment. Scale bar indicates 50 μm in the OCT image.
